# Supplementary material for: Detection of aryl hydrocarbon receptor agonists in human samples
Source: PubMed Central journal article supplement (PMC5862868; doi:10.1038/s41598-018-23323-4), 2018-03-21
Supplement: 41598_2018_23323_MOESM1_ESM.pdf [file 41598_2018_23323_MOESM1_ESM.pdf]

## **Detection of aryl hydrocarbon receptor agonists in human samples**

Veit Rothhammer<sup>1</sup>, Davis M. Borucki<sup>1</sup>, Jessica E. Kenison<sup>1</sup>, Patrick Hewson<sup>1</sup>, Zhongyan Wang<sup>2</sup>, Rohit Bakshi<sup>1</sup>, David H. Sherr<sup>2</sup> and Francisco J. Quintana<sup>1,3\*</sup>

<sup>1</sup>Ann Romney Center for Neurologic Diseases, Brigham and Women's Hospital, Harvard Medical School, Boston, MA, USA.

<sup>2</sup>Dept. of Environmental Health, Boston University School of Public Health, MA, USA

<sup>3</sup>Broad Institute of MIT and Harvard, Cambridge, MA, USA.

\*Corresponding author:

Ann Romney Center for Neurologic Diseases

Department of Neurology, Brigham and Women's Hospital, Harvard Medical School

60 Fenwood Road, Boston, MA 02115, USA.

Tel.: +1 617 525 5317; Fax: +1 617 525 5305

Email: [fquintana@rics.bwh.harvard.edu](mailto:fquintana@rics.bwh.harvard.edu)

**Supplementary information**

**a**

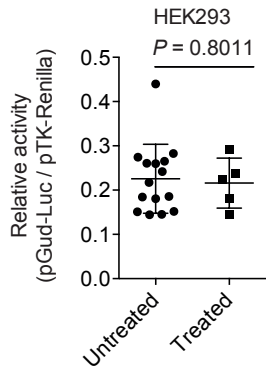

**b**

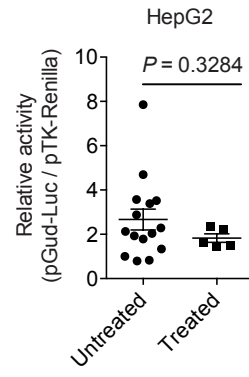

**Supplementary Figure 1. Stratification of RRMS cohort by treatment.** Luciferase activity in patients shown in **Figs. 1a,b** displayed based on the presence or absence of disease modifying therapy. Statistical analysis was performed using Student's *t*-test.
